# Supplementary material for: Tunable gas sensing features of Janus In2STe monolayers: insights from first-principles and multiphysics studies on SO2 interaction
Source: Royal Society of Chemistry journal article supplement (doi:10.1039/d5ra09962e), 2026-04-30
Supplement: d5ra09962e1.pdf [file d5ra09962e1.pdf]

### Supporting Information

## Tunable Gas Sensing Features of Janus In<sub>2</sub>STe Monolayers: Insights from First-Principles and Multiphysics Studies on SO<sub>2</sub> Interaction

Raiyan Al Nahean<sup>1‡</sup>, MD Raiyan Firoz<sup>1‡</sup>, Manik Bala<sup>1</sup>, and Md Tawabur Rahman<sup>1\*</sup>

<sup>1</sup>Department of Electrical and Electronic Engineering, Khulna University of Engineering & Technology, Khulna-9203, Bangladesh

<sup>‡</sup>equally contributed authors

\*Corresponding Author: tawabur@eee.kuet.ac.bd

Table SI The lattice constant; bond lengths of In-S ( $d_1$ ), In-In ( $d_2$ ), and In-Te ( $d_3$ ); bond angles of In-S-In ( $\theta_1$ ), In-Te-In ( $\theta_2$ ), S-In-In ( $\theta_3$ ), and Te-In-In ( $\theta_4$ ); the band gap ( $E_g$ ); VBM/CBM positions; and stability.

| Lattice Constant (Å) | $d_1$ (Å)<br>$d_2$ (Å)<br>$d_3$ (Å) | $\theta_1$ (°)<br>$\theta_3$ (°)        | $\theta_2$ (°)<br>$\theta_4$ (°) | Thickness, $t$ (Å) | $E_g$ (eV) | VBM/CBM Positions | Stability          |
|----------------------|-------------------------------------|-----------------------------------------|----------------------------------|--------------------|------------|-------------------|--------------------|
| $a = b = 4.16$       | 2.53<br>2.73<br>2.75                | 103.36°<br>92.19°<br>115.02°<br>123.72° |                                  | 5.37               | 1.402      | $\Gamma/\Gamma$   | Dynamically Stable |

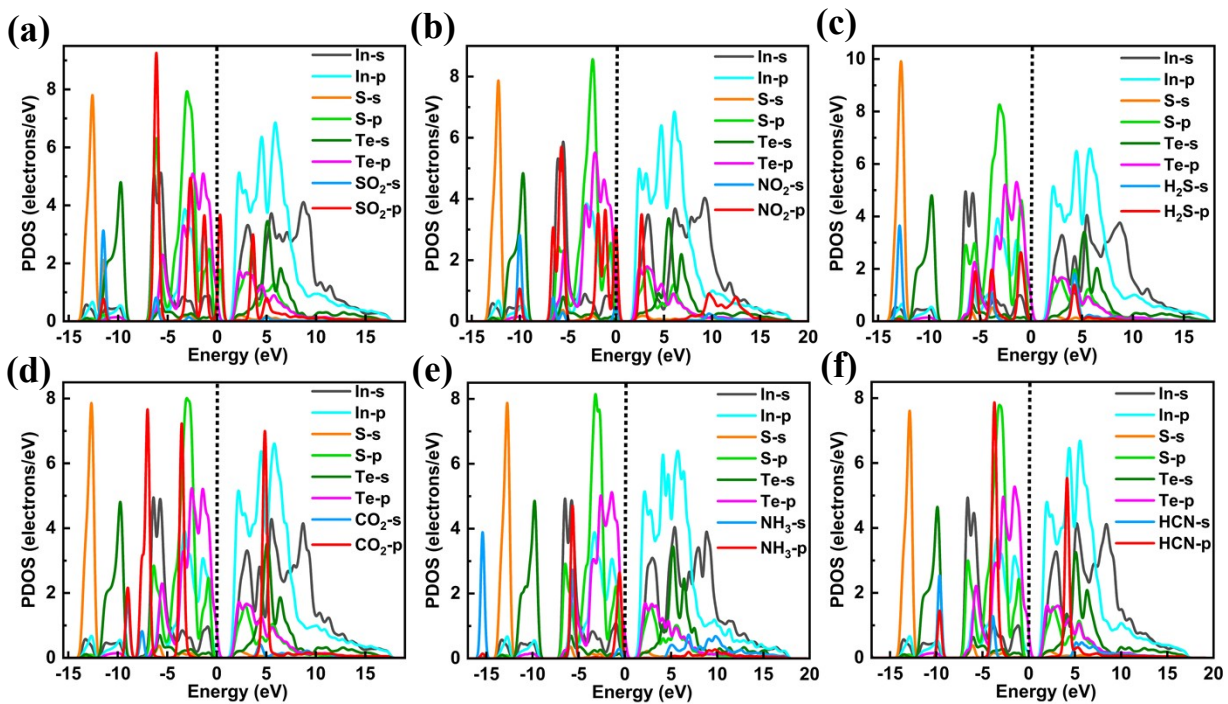

Fig. S11. The PDOS of Janus  $\text{In}_2\text{STe}$  adsorbed with (a)  $\text{SO}_2$ , (b)  $\text{NO}_2$ , (c)  $\text{H}_2\text{S}$ , (d)  $\text{CO}_2$ , (e)  $\text{NH}_3$ , and (f)  $\text{HCN}$  molecules.

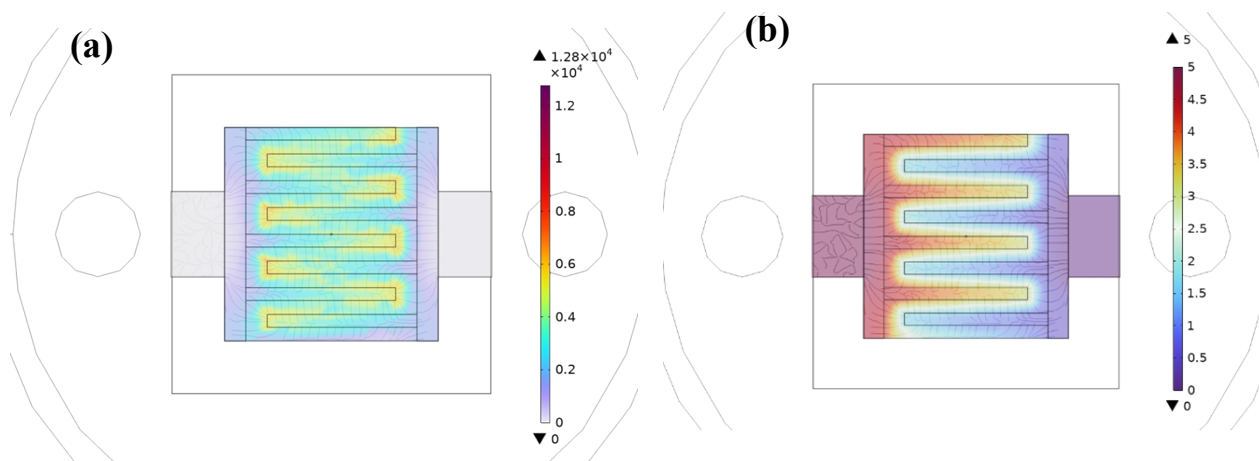

Fig. S12. (a) Electric field distribution in the interdigitated Sensor (b) Electric potential distribution in the interdigitated Sensor.
